# Supplementary material for: Understanding A and B-site engineered lead-free Ba(1−x)CaxZryTi(1−y)O3 piezoceramics: a perspective from DFT
Source: Royal Society of Chemistry journal article supplement (doi:10.1039/d0tc05724j), 2021-01-01
Supplement: d0tc05724j1.pdf [file d0tc05724j1.pdf]

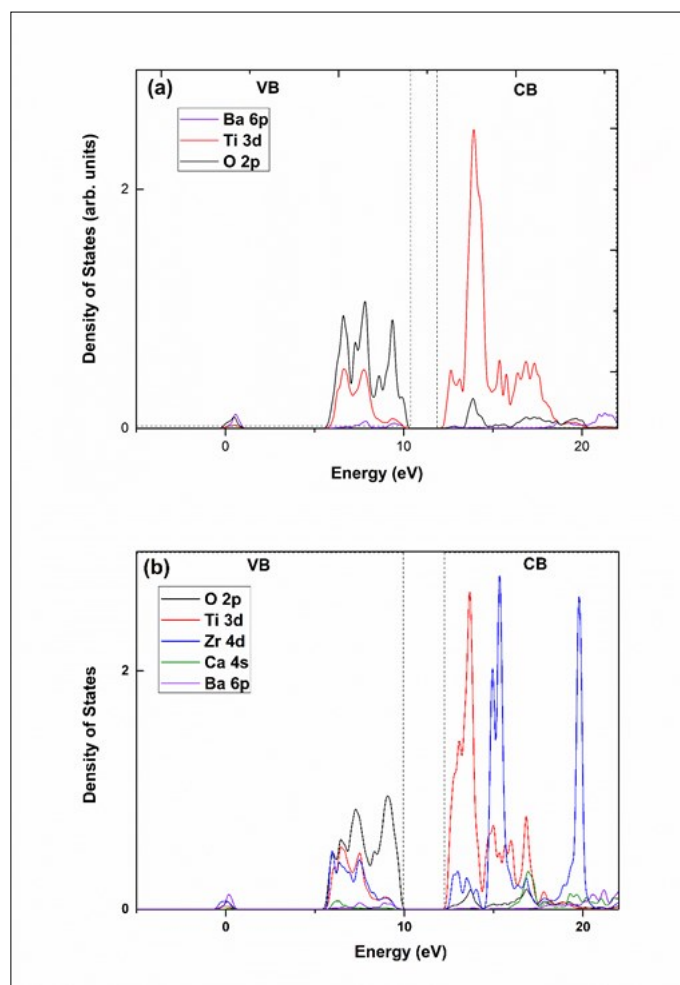

*S.I. Fig. 1.* Calculated partial density of states (PDOS) of BT (Tetra) and BCZT (Tetra) with constituent ions valence states.

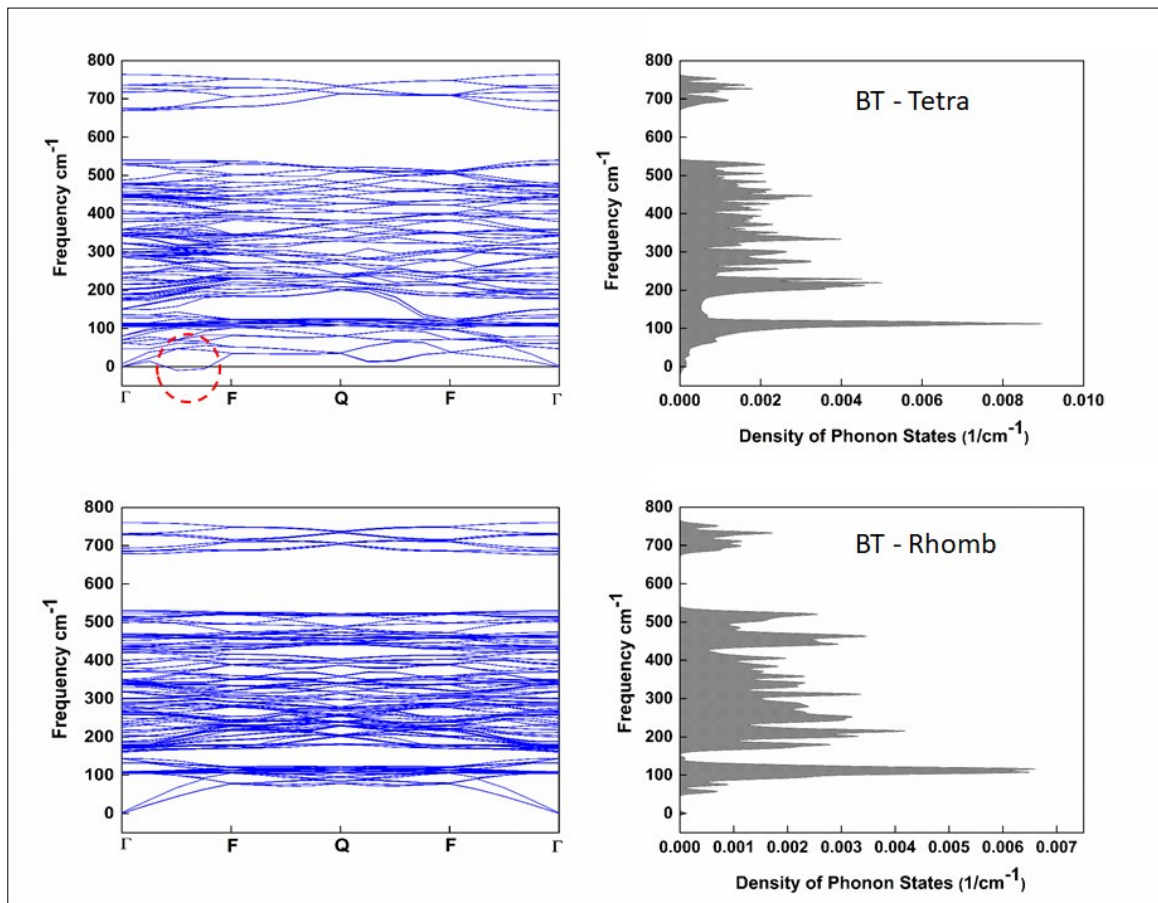

*S.I. Fig. 2.* Phonon dispersion and Phonon density of states of BT with tetragonal and rhombohedral structures.
